# Supplementary material for: Bilateral Lumbar Hernias Following Spine Surgery: A Case Report and Laparoscopic Transabdominal Repair
Source: Case Rep Surg. 2020 Jul 31;2020:8859106. doi: 10.1155/2020/8859106 (PMC7415095; doi:10.1155/2020/8859106)
Supplement: Supplementary Materials — Supplemental Video 1: this video demonstrates a laparoscopic transabdominal lumbar hernia repair with extraperitoneal mesh placement. [file 8859106.f1.zip]

Archive with 2 entries (2 files):
- Lumbar Hernia Final.mp4
- Lumbar hernia Repair Operation only.mp4
